# Supplementary material
Source: PubMed Central journal article supplement (PMC5166593)
Supplement: 2016-004_Marrie_supplementary_appendix.pdf [file 2016-004_Marrie_supplementary_appendix.pdf]

**Supplementary Appendix 1. Search strategy**

CINAHL

|     |                                                                                                          |
|-----|----------------------------------------------------------------------------------------------------------|
| S27 | S16 AND S26                                                                                              |
| S26 | S17 OR S18 OR S19 OR S20 OR S21 OR S22 OR S23<br>OR S24 OR S25                                           |
| S25 | survey*                                                                                                  |
| S24 | scale*                                                                                                   |
| S23 | psychological test                                                                                       |
| S22 | inventor*                                                                                                |
| S21 | questionnaire*                                                                                           |
| S20 | measure*                                                                                                 |
| S19 | tool*                                                                                                    |
| S18 | screen*                                                                                                  |
| S17 | valid*                                                                                                   |
| S16 | (S2 OR S3 OR S4 OR S5 OR S6 OR S7 OR S8 OR S9 OR<br>S10 OR S11 OR S12 OR S13 OR S14) AND (S1 AND<br>S15) |
| S15 | S2 OR S3 OR S4 OR S5 OR S6 OR S7 OR S8 OR S9 OR<br>S10 OR S11 OR S12 OR S13 OR S14                       |
| S14 | PTSD                                                                                                     |
| S13 | post traumatic stress disorder                                                                           |
| S12 | phobic disorder                                                                                          |
| S11 | panic disorder                                                                                           |
| S10 | OCD                                                                                                      |
| S9  | obsessive compulsive disorder                                                                            |
| S8  | GAD                                                                                                      |
| S7  | generalized anxiety disorder                                                                             |
| S6  | mental health                                                                                            |
| S5  | psychiatric                                                                                              |
| S4  | anxi*                                                                                                    |
| S3  | anxious                                                                                                  |
| S2  | anxiety                                                                                                  |
| S1  | multiple sclerosis                                                                                       |

## EMBASE

1. multiple sclerosis/
2. "multiple sclerosis".mp.
3. "disseminated sclerosis".mp.
4. 1 or 2 or 3
5. Mental Disorders/
6. Mental health/
7. mental health services/
8. anxiety/
9. anxiety disorder/
10. anxiety.mp.
11. anxious.mp.
12. anxi\*.mp.
13. psychiatric.mp.
14. "mental health".mp.
15. generalized anxiety disorder.mp.
16. GAD.mp.
17. obsessive compulsive disorder.mp.
18. OCD.mp.
19. panic disorder.mp.
20. phobic disorder.mp.
21. post traumatic stress disorder.mp.
22. PTSD.mp.
23. 5 or 6 or 7 or 8 or 9 or 10 or 11 or 12 or 13 or 14 or 15 or 16 or 17 or 18 or 19 or 20 or 21 or 22
24. health surveys/
25. psychological test/
26. screening/
27. questionnaires/
28. predictive value of test/
29. psychiatric status rating scales/
30. valid\*.mp.
31. screen\*.mp.
32. tool\*.mp.
33. measure\*.mp.
34. questionnaire\*.mp.
35. inventor\*.mp.
36. psychological test.mp.
37. scale\*.mp.
38. survey\*.mp.
39. 24 or 25 or 26 or 27 or 28 or 29 or 30 or 31 or 32 or 33 or 34 or 35 or 36 or 37 or 38
40. 4 and 23 and 39

MEDLINE

1. anxiety.mp.
2. anxious.mp.
3. anxi\*.mp.
4. psychiatric.mp.
5. mental health.mp.
6. generalized anxiety disorder.mp.
7. GAD.mp.
8. obsessive compulsive disorder.mp.
9. OCD.mp.
10. panic disorder.mp.
11. phobic disorder.mp.
12. post traumatic stress disorder.mp.
13. PTSD.mp.
14. Mental Disorders/
15. Mental health/
16. mental health services/
17. anxiety/
18. anxiety disorder/
19. 1 or 2 or 3 or 4 or 5 or 6 or 7 or 8 or 9 or 10 or 11 or 12 or 13 or 14 or 15 or 16 or 17 or 18
20. valid\*.mp.
21. screen\*.mp.
22. tool\*.mp.
23. measure\*.mp.
24. questionnaire\*.mp.
25. inventor\*.mp.
26. psychological test.mp.
27. scale\*.mp.
28. survey\*.mp.
29. health surveys/
30. psychological test/
31. screening/
32. measure/
33. predictive value of test/
34. psychiatric status rating scales/
35. questionnaires/
36. 20 or 21 or 22 or 23 or 24 or 25 or 26 or 27 or 28 or 29 or 30 or 31 or 32 or 33 or 34 or 35
37. multiple sclerosis/ or multiple sclerosis, chronic progressive/ or multiple sclerosis, relapsing-remitting/
38. (multiple sclerosis or disseminated sclerosis).mp.
39. 37 or 38
41. 19 and 36 and 39

## Psycharticles

1. multiple sclerosis.mp. [mp=title, abstract, full text, caption text]
2. disseminated sclerosis.mp.
3. 1 or 2
4. anxiety.mp.
5. anxious.mp.
6. ansi\*.mp.
7. psychiatric.mp.
8. mental health.mp.
9. generalized anxiety disorder.mp.
10. GAD.mp.
11. obsessive compulsive disorder.mp.
12. OCD.mp.
13. panic disorder.mp.
14. phobic disorder.mp.
15. post traumatic stress disorder.mp.
16. PTSD.mp.
17. 4 or 5 or 6 or 7 or 8 or 9 or 10 or 11 or 12 or 13 or 14 or 15 or 16
18. valid\*.mp.
19. screen\*.mp.
20. tool\*.mp.
21. measure\*.mp.
22. questionnaire\*.mp.
23. inventor\*.mp.
24. psychological test.mp.
25. scale\*.mp.
26. survey\*.mp.
27. 18 or 19 or 20 or 21 or 22 or 23 or 24 or 25 or 26
28. 3 and 17 and 27

## PsycINFO

((anxiety OR anxious OR anxi\* OR psychiatric OR psychiatric OR (mental health) OR (generalized anxiety disorder) OR GAD OR (obsessive compulsive disorder) OR OCD OR (panic disorder) OR (phobic disorder) OR (post-traumatic stress disorder) OR (post-traumatic stress disorder) OR PTSD OR (mental disorders) OR (mental health) OR (anxiety disorders)) AND (multiple sclerosis) AND (valid\* OR screen\* OR tool\* OR measure\* OR questionnaire\* OR inventor\* OR (psychological test) OR scale\* OR survey\* OR (psychological assessment) OR (rating scales))

## Scopus

(TITLE-ABS-KEY(anxiety OR anxious OR anxi\* OR psychiatric OR psychiatric OR (mental health) OR (generalized anxiety disorder) OR GAD OR (obsessive compulsive disorder) OR OCD OR (panic disorder) OR (phobic disorder) OR (post-traumatic stress disorder) OR (post-traumatic stress disorder) OR PTSD OR (mental disorders) OR (mental health) OR (anxiety disorders)) AND (TITLE-ABS-KEY(multiple sclerosis)) AND (TITLE-ABS-KEY(valid\* OR screen\* OR tool\* OR measure\* OR questionnaire\* OR inventor\* OR (psychological test) OR scale\* OR survey\* OR (psychological assessment) OR (rating scales)))

Web Of Science

- #26 AND #16
- #28 Refined by: **Databases:** (WOS)  
*DocType=All document types; Language=All languages;*
- #27 #26 AND #16  
*DocType=All document types; Language=All languages;*
- #26 #25 OR #24 OR #23 OR #22 OR #21 OR #20 OR #19 OR #18 OR #17  
*DocType=All document types; Language=All languages;*
- #25 **TOPIC:** (survey\*)  
*DocType=All document types; Language=All languages;*
- #24 **TOPIC:** (scale\*)  
*DocType=All document types; Language=All languages;*
- #23 **TOPIC:** ("psychological test")  
*DocType=All document types; Language=All languages;*
- #22 **TOPIC:** (inventor\*)  
*DocType=All document types; Language=All languages;*
- #21 **TOPIC:** (questionnaire\*)  
*DocType=All document types; Language=All languages;*
- #20 **TOPIC:** (measure\*)  
*DocType=All document types; Language=All languages;*
- #19 **TOPIC:** (tool\*)  
*DocType=All document types; Language=All languages;*
- #18 **TOPIC:** (screen\*)  
*DocType=All document types; Language=All languages;*
- #17 **TOPIC:** (valid\*)  
*DocType=All document types; Language=All languages;*
- #16 #15 AND #14  
*DocType=All document types; Language=All languages;*
- #15 **TOPIC:** ("multiple sclerosis")  
*DocType=All document types; Language=All languages;*
- #14 #13 OR #12 OR #11 OR #10 OR #9 OR #8 OR #7 OR #6 OR #5 OR #4 OR #3 OR #2 OR #1  
*DocType=All document types; Language=All languages;*
- #13 **TOPIC:** ("PTSD")  
*DocType=All document types; Language=All languages;*
- #12 **TOPIC:** ("post traumatic stress disorder")  
*DocType=All document types; Language=All languages;*
- #11 **TOPIC:** ("phobic disorder")  
*DocType=All document types; Language=All languages;*
- #10 **TOPIC:** ("panic disorder")  
*DocType=All document types; Language=All languages;*
- #9 **TOPIC:** ("generalized anxiety disorder")  
*DocType=All document types; Language=All languages;*
- #8 **TOPIC:** (OCD)  
*DocType=All document types; Language=All languages;*
- #7 **TOPIC:** ("obsessive compulsive disorder")

## Web Of Science

- DocType=All document types; Language=All languages;*  
**TOPIC: (GAD)**  
#6 *DocType=All document types; Language=All languages;*
- TOPIC: (mental health)**  
#5 *DocType=All document types; Language=All languages;*
- TOPIC: (psychiatric)**  
#4 *DocType=All document types; Language=All languages;*
- TOPIC: (anxi\*)**  
#3 *DocType=All document types; Language=All languages;*
- TOPIC: (anxious)**  
#2 *DocType=All document types; Language=All languages;*
- TOPIC: (anxiety)**  
#1 *DocType=All document types; Language=All languages;*
